# Supplementary material for: Long-term results in malignant pleural mesothelioma treated with neoadjuvant chemotherapy, extrapleural pneumonectomy and intensity-modulated radiotherapy
Source: Springer Nature journal article supplement (doi:10.1186/s13014-015-0575-5), 2015-12-01
Supplement: MOESM1 [file 9774154]

**Supplementary File 1:**  
**Literature overview of recent studies evaluating radiotherapy (RT)**  
**after extrapleural pneumonectomy (EPP)**

| <b>Author (Institution)</b>                                | <b>RT Dose, Technique</b>                | <b>Patients</b>                                      | <b>Survival times</b>                                                                                                                                                                                                                       | <b>Acute RT Lung Toxicity</b>                   |
|------------------------------------------------------------|------------------------------------------|------------------------------------------------------|---------------------------------------------------------------------------------------------------------------------------------------------------------------------------------------------------------------------------------------------|-------------------------------------------------|
| Krayenbuehl et al. 2014 <sup>12</sup> (Zürich)             | 3D-CRT: 45Gy+12.6 Gy Boost (57.6 Gy)     | 25                                                   | From start of chemotherapy:<br><br>Local in-field recurrence rate 48%, marginal miss rate 4%.<br>Median time to local relapse 10.9±5.4 months (72.7%),<br>Median time to distant met. 16.7±7.7 months (80%).<br>Median OS 26.9±11.8 months. | Not reported.                                   |
|                                                            | IMRT/VMAT: 45.5Gy with SIB up to 55.9Gy  | 14                                                   | From start of chemotherapy:<br><br>Local in-field recurrence rate 21.4%, marginal miss rate 7.1%. Median time to distant met. 18.4±10.7 months (71.4%).<br>Median OS 20.8±14.4 months.                                                      | Not reported.                                   |
| Rice et al. 2007 <sup>14</sup> (MD Anderson)               | IMRT, Median dose 45Gy, Boost up to 60Gy | 63 (for OS analysis)<br>61 (for recurrence analysis) | From date of surgery:<br><br>Locoregional recurrence rate 13%, local in-field recurrence rate 5%. Median OS 14.2 months, 3-year-OS 20%.                                                                                                     | Two grade 5 pneumonitis, four grade 5 pneumonia |
| Gomez et al. 2013 <sup>4</sup> (MD Anderson)               | IMRT                                     | 86                                                   | Median OS 14.7 months.<br>1-yr-OS 55%, 2-yr-OS 32%.<br>1-yr-LRC 88%, 2-yr-LRC 71%.<br>1-yr-DM-free 55%,2-yr-DM-free 40%.                                                                                                                    | Five grade 5 pulmonary toxicity                 |
| Stahel et al. 2014 <sup>15</sup> (Switzerland, SAKK 17/04) | CTV1 45/46Gy, CTV2 up to 55.9/56.2 Gy    | 27 started RT, 25 completed RT                       | Reference time point not specified in abstract.<br><br>Median local relapse-free survival 9.4 months (95% CI: 6.5-11.9).<br>Overall relapse-free survival 7.6 months (95% CI: 5.2-10.6).<br>OS 14.9 months (95% CI: 7.0-17.6).              | Not reported (late-breaking abstract)           |

|                                                                                                 |                                                                             |                                                  |                                                                                                                                                                                                                  |                                                                                                 |
|-------------------------------------------------------------------------------------------------|-----------------------------------------------------------------------------|--------------------------------------------------|------------------------------------------------------------------------------------------------------------------------------------------------------------------------------------------------------------------|-------------------------------------------------------------------------------------------------|
| Sylvestre et al. 2011 <sup>9</sup> , updated in Helou et al. 2013 <sup>10</sup> (Paris, Nantes) | Helical tomotherapy, median dose 50Gy                                       | 24 (29 in update)                                | From date of diagnosis:<br>2-yr disease-free survival 51.8% (95% CI: 30.0-90.0 months).<br>In update: 1yr-OS 65%, 2yr-OS 36%, median OS 18 months.                                                               | Two grade 5 pneumonitis suspected (median lung dose 11Gy).                                      |
| Patel et al. 2012 <sup>7</sup> (Duke)                                                           | 45Gy + 10-15Gy boost                                                        | 30                                               | From date of surgery:<br>Median OS 23.2 months.<br>2-yr-LC 47%, 2yr-DFS 34%, 2-yr-OS 50%.                                                                                                                        | No fatal lung toxicity in the last 15 pts. (Miles et al. 2008 reported one grade 5 pneumonitis) |
| Tonoli et al. 2011 <sup>8</sup> (Brescia, Florence, Modena)                                     | 3DCRT (4), IMRT (50), helical tomotherapy (2).<br>45-50Gy, boost up to 60Gy | 56                                               | From date of surgery:<br><br>3yr-locoregional control 90%.<br>3yr-distant met. Free survival 66%.<br>3yr-disease free survival 57%.<br>3yr-overall survival 60%.                                                 | No fatal lung toxicity.                                                                         |
| Kristensen et al. 2009 <sup>16</sup> (Copenhagen)                                               | IMRT.<br>50Gy, boost up to 60Gy                                             | 26                                               | Not reported.                                                                                                                                                                                                    | Four grade 5 pneumonitis, median MLD 13.9Gy                                                     |
| Federico et al. 2013 <sup>13</sup> (Padua, Milan, Rome, Mestre)                                 | Median dose 54Gy, later 50.4Gy                                              | 54 pts. enrolled, 32 started RT, 25 completed RT | From date of enrolment:<br><br>Median progression-free survival 8.6 months (95% CI: 6.3-14.4).<br>Median OS 15.5 months (95% CI: 11.0-NA)                                                                        | Dose reduction after two grade 5 cardiopulmonary events.                                        |
| van Schil et al. 2010 <sup>17</sup> (EORTC 08031)                                               | 3DCRT(24), IMRT (14).<br>54Gy                                               | 59 pts enrolled, 38 started RT, 37 completed RT  | Reference time point not specified.<br>Median PFS: 13.9 months (95% CI: 10.9-17.2).<br>Median OS: 18.4 months (95% CI: 15.6-32.9)<br>Median OS of the 37 pts who completed RT: 33 months (median hardly reached) | Two grade 5 pneumonia.                                                                          |
| Fahrner et al. 2012 <sup>11</sup> (Bern)                                                        | 60-65Gy                                                                     | 24 pts started trimodal therapy, 16 completed RT | From date of diagnosis:<br><br>1-, 2-, and 3-year OS 71%, 28%, 10%.<br><br>Median OS 23.2 months (range 2.1-59.4)<br>1-year-PFS 47%, 5-year-PFS 6%. Median PFS 18.8 months (range 2.6-74.3)                      | Not reported.                                                                                   |
| Current study                                                                                   | Step&shoot IMRT (41), helical tomotherapy (21)<br><br>48-54 Gy              | 62                                               | From date of surgery:<br>Median OS 20.4 months.<br><br>1-, 2-, and 3-year OS 63%, 42%, 28%.                                                                                                                      | One grade 1 pneumonitis, one grade 3 pneumonitis. No fatal lung toxicity.                       |
